# Supplementary material for: The Aphasia Rapid Test: an NIHSS-like aphasia test
Source: PubMed Central journal article supplement — J Neurol. 2013 May 15;260(8):2110–7. doi: 10.1007/s00415-013-6943-x (PMC3734736; doi:10.1007/s00415-013-6943-x), 2013-05-15
Supplement: 415_2013_6943_MOESM1_ESM.pdf [file 415_2013_6943_MOESM1_ESM.pdf]

**ELECTRONIC SUPPLEMENTAL MATERIAL**

**ONLINE RESOURCE 1**

**Article Title:**

**The Aphasia Rapid Test: an NIHSS-like aphasia test.**

**Journal:**

**Journal of Neurology**

**Authors:**

**AZUAR C. (MD, 1-2), LEGER A. (MD, 1), ARBIZU C. (2), HENRY-AMAR F. (2), CHOMEL-GUILLAUME S. (SP, 3), SAMSON Y. (MD, 1)**

(1) APHP Service des Urgences Cérébro-Vasculaires, Groupe Hospitalier Pitié-Salpêtrière, 75013-Paris, France, COGIMAGE CR ICM, ICM UPMC Paris VI Inserm U 975, CNRS UMR 7225,

(2) APHP Fédération de Neurologie, Institut de la Mémoire, Groupe Hospitalier Pitié-Salpêtrière, 75013-Paris, France,

(3) Service de Neurologie, Centre Hospitalier de Versailles, 78157-Le Chesnay, France.

**Corresponding author:**

Dr Carole AZUAR

Institut de la Mémoire et de la Maladie d'Alzheimer

Groupe Hospitalier Pitié-Salpêtrière

47, Boulevard de l'Hôpital

75013-Paris,

France

Phone: (33-1) 42 16 75 22

Fax: (33-1) 42 16 75 07

E-mail: carole.azuar@psl.aphp.fr

| Instructions                                                                                                                                                                                                                   | Cotation                                                                                                                                                                                                                                                                                                                                                                                                                                                          |
|--------------------------------------------------------------------------------------------------------------------------------------------------------------------------------------------------------------------------------|-------------------------------------------------------------------------------------------------------------------------------------------------------------------------------------------------------------------------------------------------------------------------------------------------------------------------------------------------------------------------------------------------------------------------------------------------------------------|
| <p><b>1a. Exécution d'ordres simples :</b><br/>« Ouvrez et fermez les yeux. »<br/>« Donnez-moi la main gauche. »</p> <p><b>1b. Exécution d'ordre complexe :</b><br/>« Mettez votre main gauche sur votre oreille droite. »</p> | <p>0 = exécute les 2 ordres correctement.<br/>1 = exécute 1 seul ordre correctement.<br/>2 = n'exécute aucun des 2 ordres.</p> <p>0 = exécute l'ordre en moins de 10 secondes.<br/>1 = exécute l'ordre en plus de 10 secondes ou nécessité d'un rappel de la consigne.<br/>2 = exécute partiellement l'ordre : passe la ligne médiane ou exécute mais avec erreur de côté.<br/>3 = n'exécute pas l'ordre : ne passe pas la ligne médiane ou pas de mouvement.</p> |
| <p><b>2. Répétition de mots :</b><br/><b>2a.</b> « anneau »<br/><b>2b.</b> « macaron »<br/><b>2c.</b> « bagage »</p>                                                                                                           | <p>Chaque mot est coté de 0 à 2 (total de 0 à 6), avec pour chacun:<br/>0 = répétition parfaite.<br/>1 = mot reconnaissable.<br/>2 = mot non reconnaissable.</p>                                                                                                                                                                                                                                                                                                  |
| <p><b>3. Répétition de phrase :</b><br/>« Le garçon chante dans les bois.»</p>                                                                                                                                                 | <p>0 = répétition parfaite.<br/>1 = phrase reconnaissable.<br/>2 = phrase non reconnaissable.</p>                                                                                                                                                                                                                                                                                                                                                                 |
| <p><b>4. Dénomination d'objets :</b><br/><b>4a.</b> « montre »<br/><b>4b.</b> « stylo »<br/><b>4c.</b> « blouse »</p>                                                                                                          | <p>Chaque mot est coté de 0 à 2 (total de 0 à 6), avec pour chacun:<br/>0 = dénomination parfaite.<br/>1 = mot reconnaissable.<br/>2 = mot non reconnaissable.</p>                                                                                                                                                                                                                                                                                                |
| <p><b>5. Evaluation de la dysarthrie :</b></p>                                                                                                                                                                                 | <p>0 = pas de dysarthrie.<br/>1 = dysarthrie minime.<br/>2 = dysarthrie modérée, compréhensible.<br/>3 = dysarthrie sévère, incompréhensible.</p>                                                                                                                                                                                                                                                                                                                 |
| <p><b>6. Fluence catégorielle :</b><br/>« Dites le plus de noms d'animaux en 1 minute. »</p>                                                                                                                                   | <p>0 = plus de quinze mots.<br/>1 = entre onze et quinze mots.<br/>2 = entre six et dix mots.<br/>3 = entre trois et cinq mots.<br/>4 = entre zéro et deux mots.</p>                                                                                                                                                                                                                                                                                              |
| <p><b>Score total</b></p>                                                                                                                                                                                                      | <p><b>/26</b></p>                                                                                                                                                                                                                                                                                                                                                                                                                                                 |

**Table :**  
**French version of the Aphasia Rapid Test.**
